# Supplementary material
Source: Springer Nature journal article supplement (https://www.springermedizin.de/resource/supplementary/12933_2007_101_MOESM4_ESM.pdf/9539590)

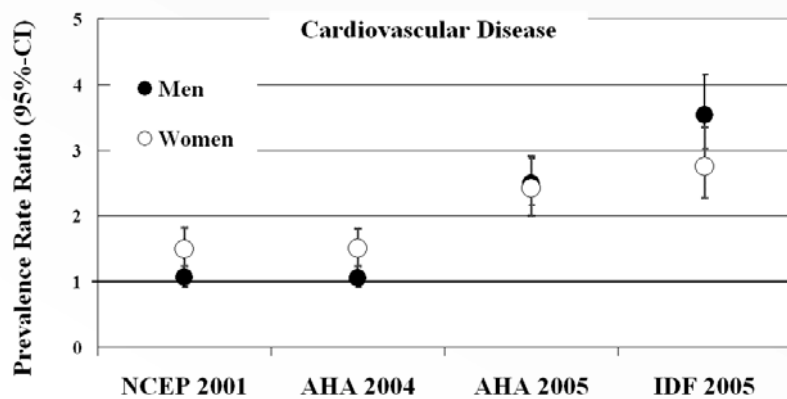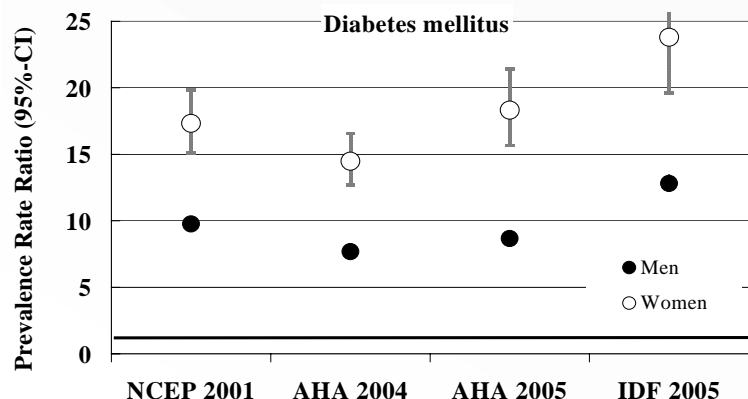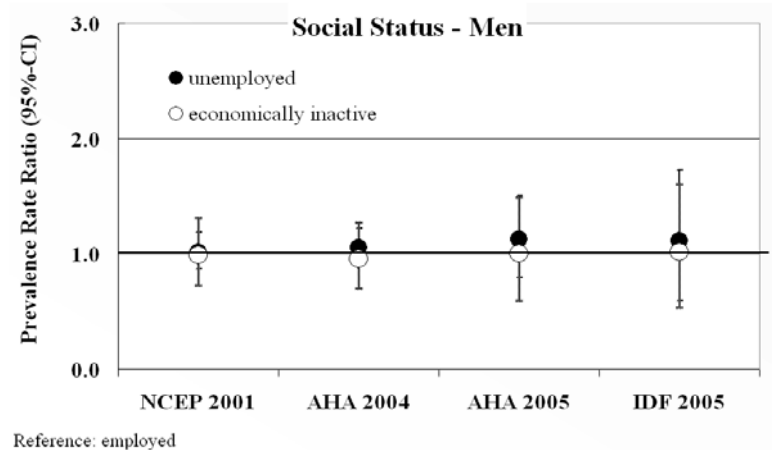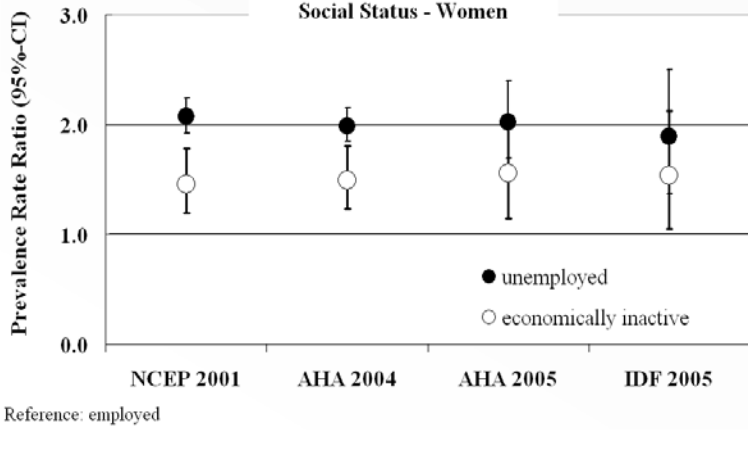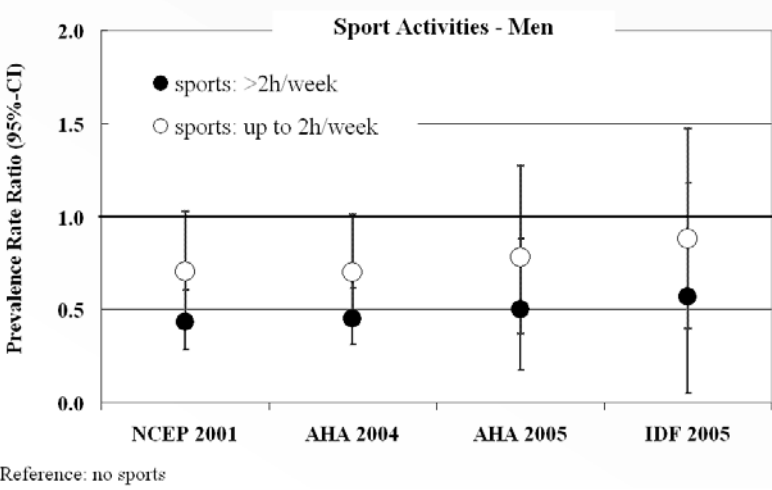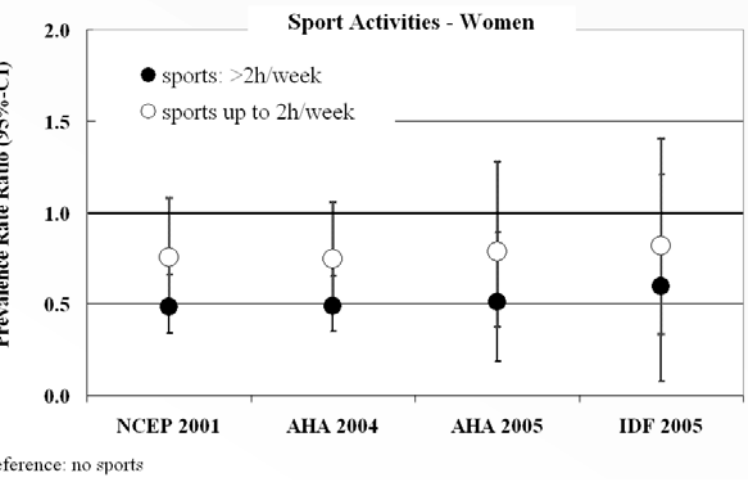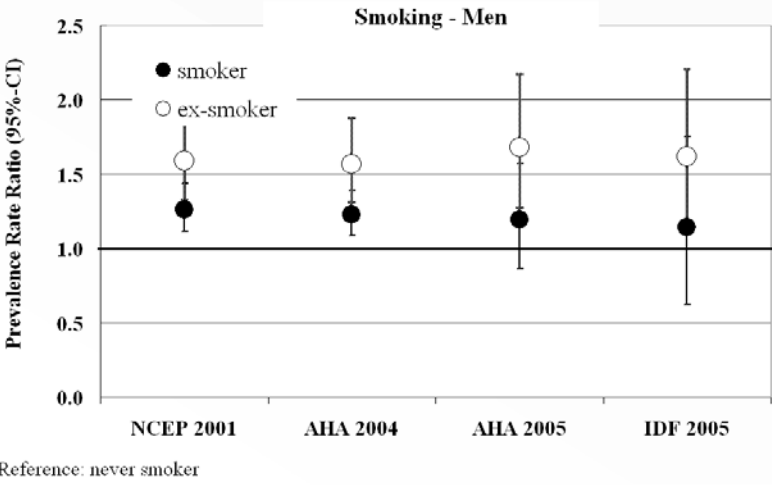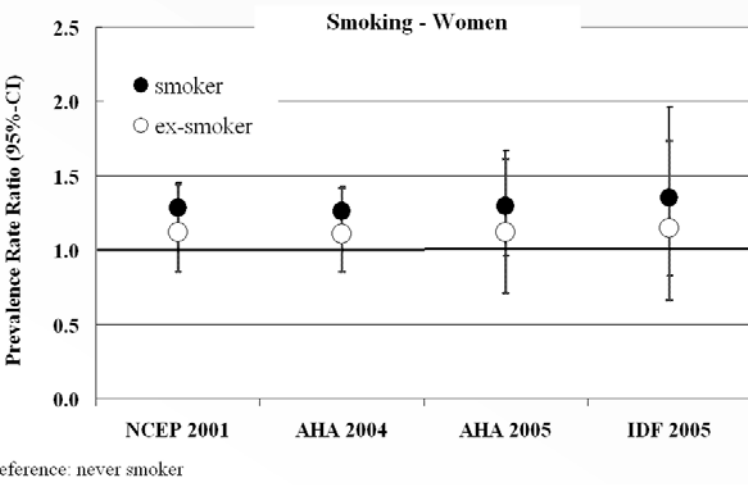

Supplement: MOESM4 [file 9539590]
